# Supplementary material for: Extensive diversity of Rickettsiales bacteria in two species of ticks from China and the evolution of the Rickettsiales
Source: PubMed Central journal article supplement (PMC4236549; doi:10.1186/s12862-014-0167-2), 2014-07-30

genus *Rickettsia*

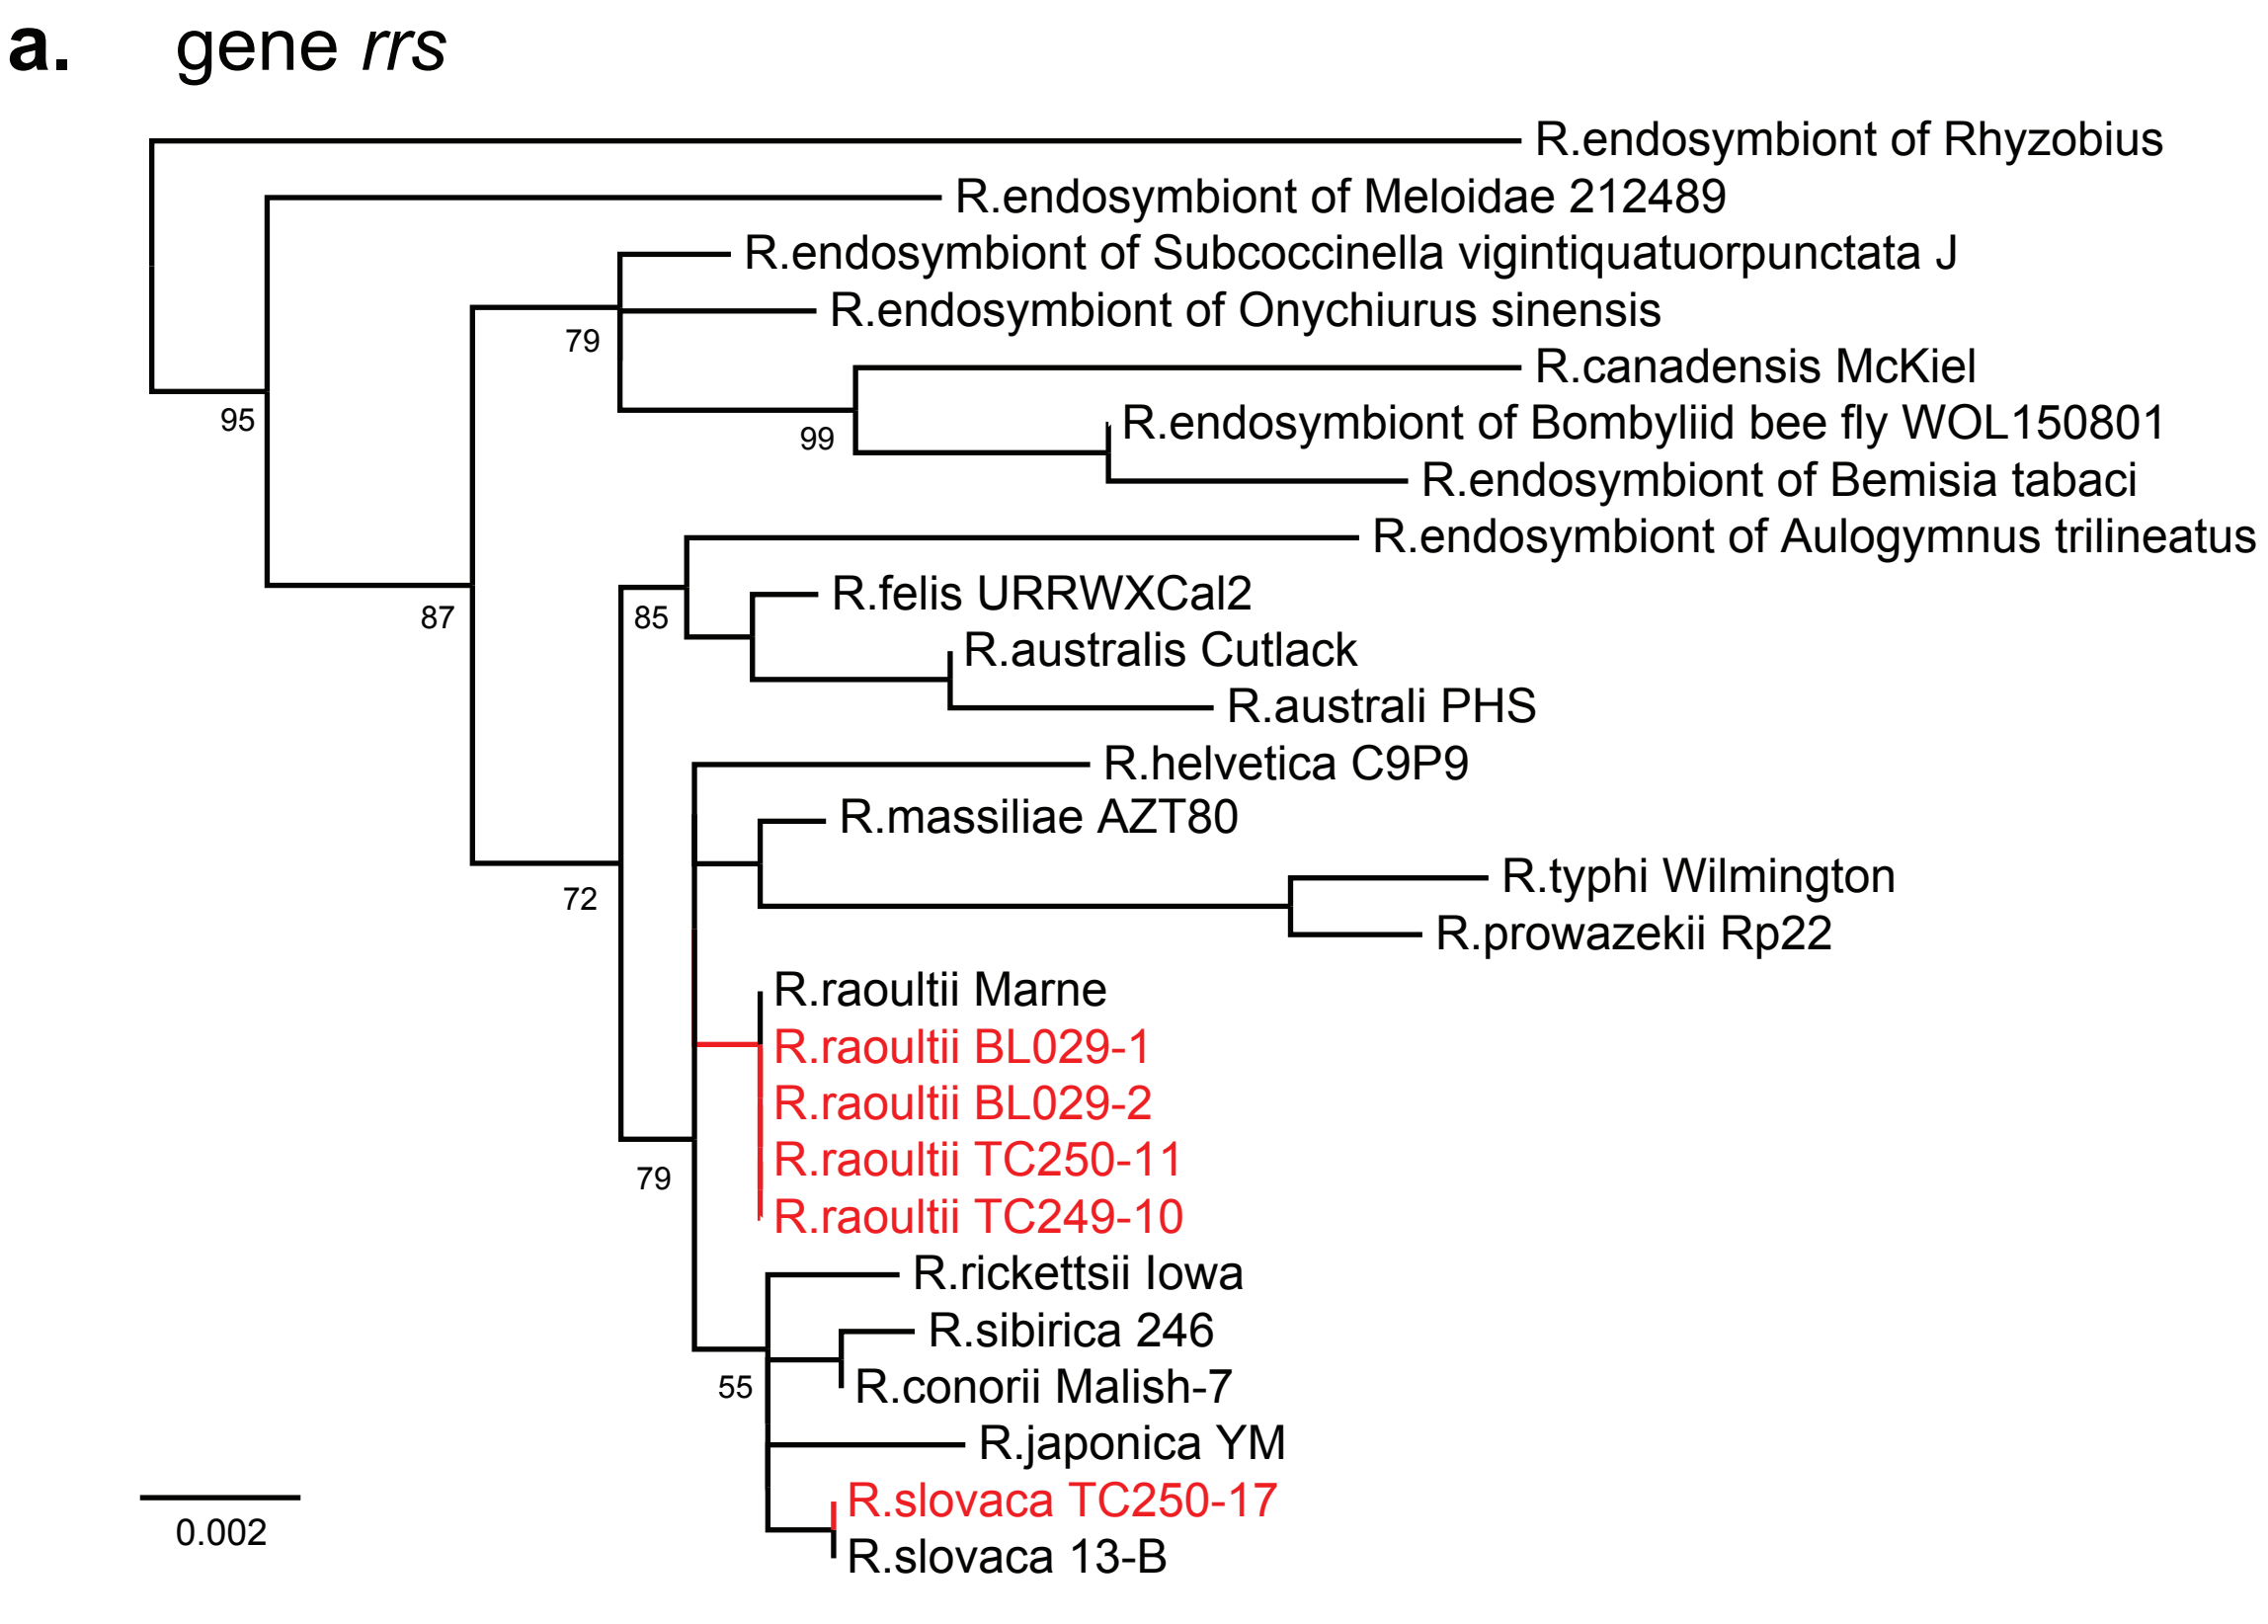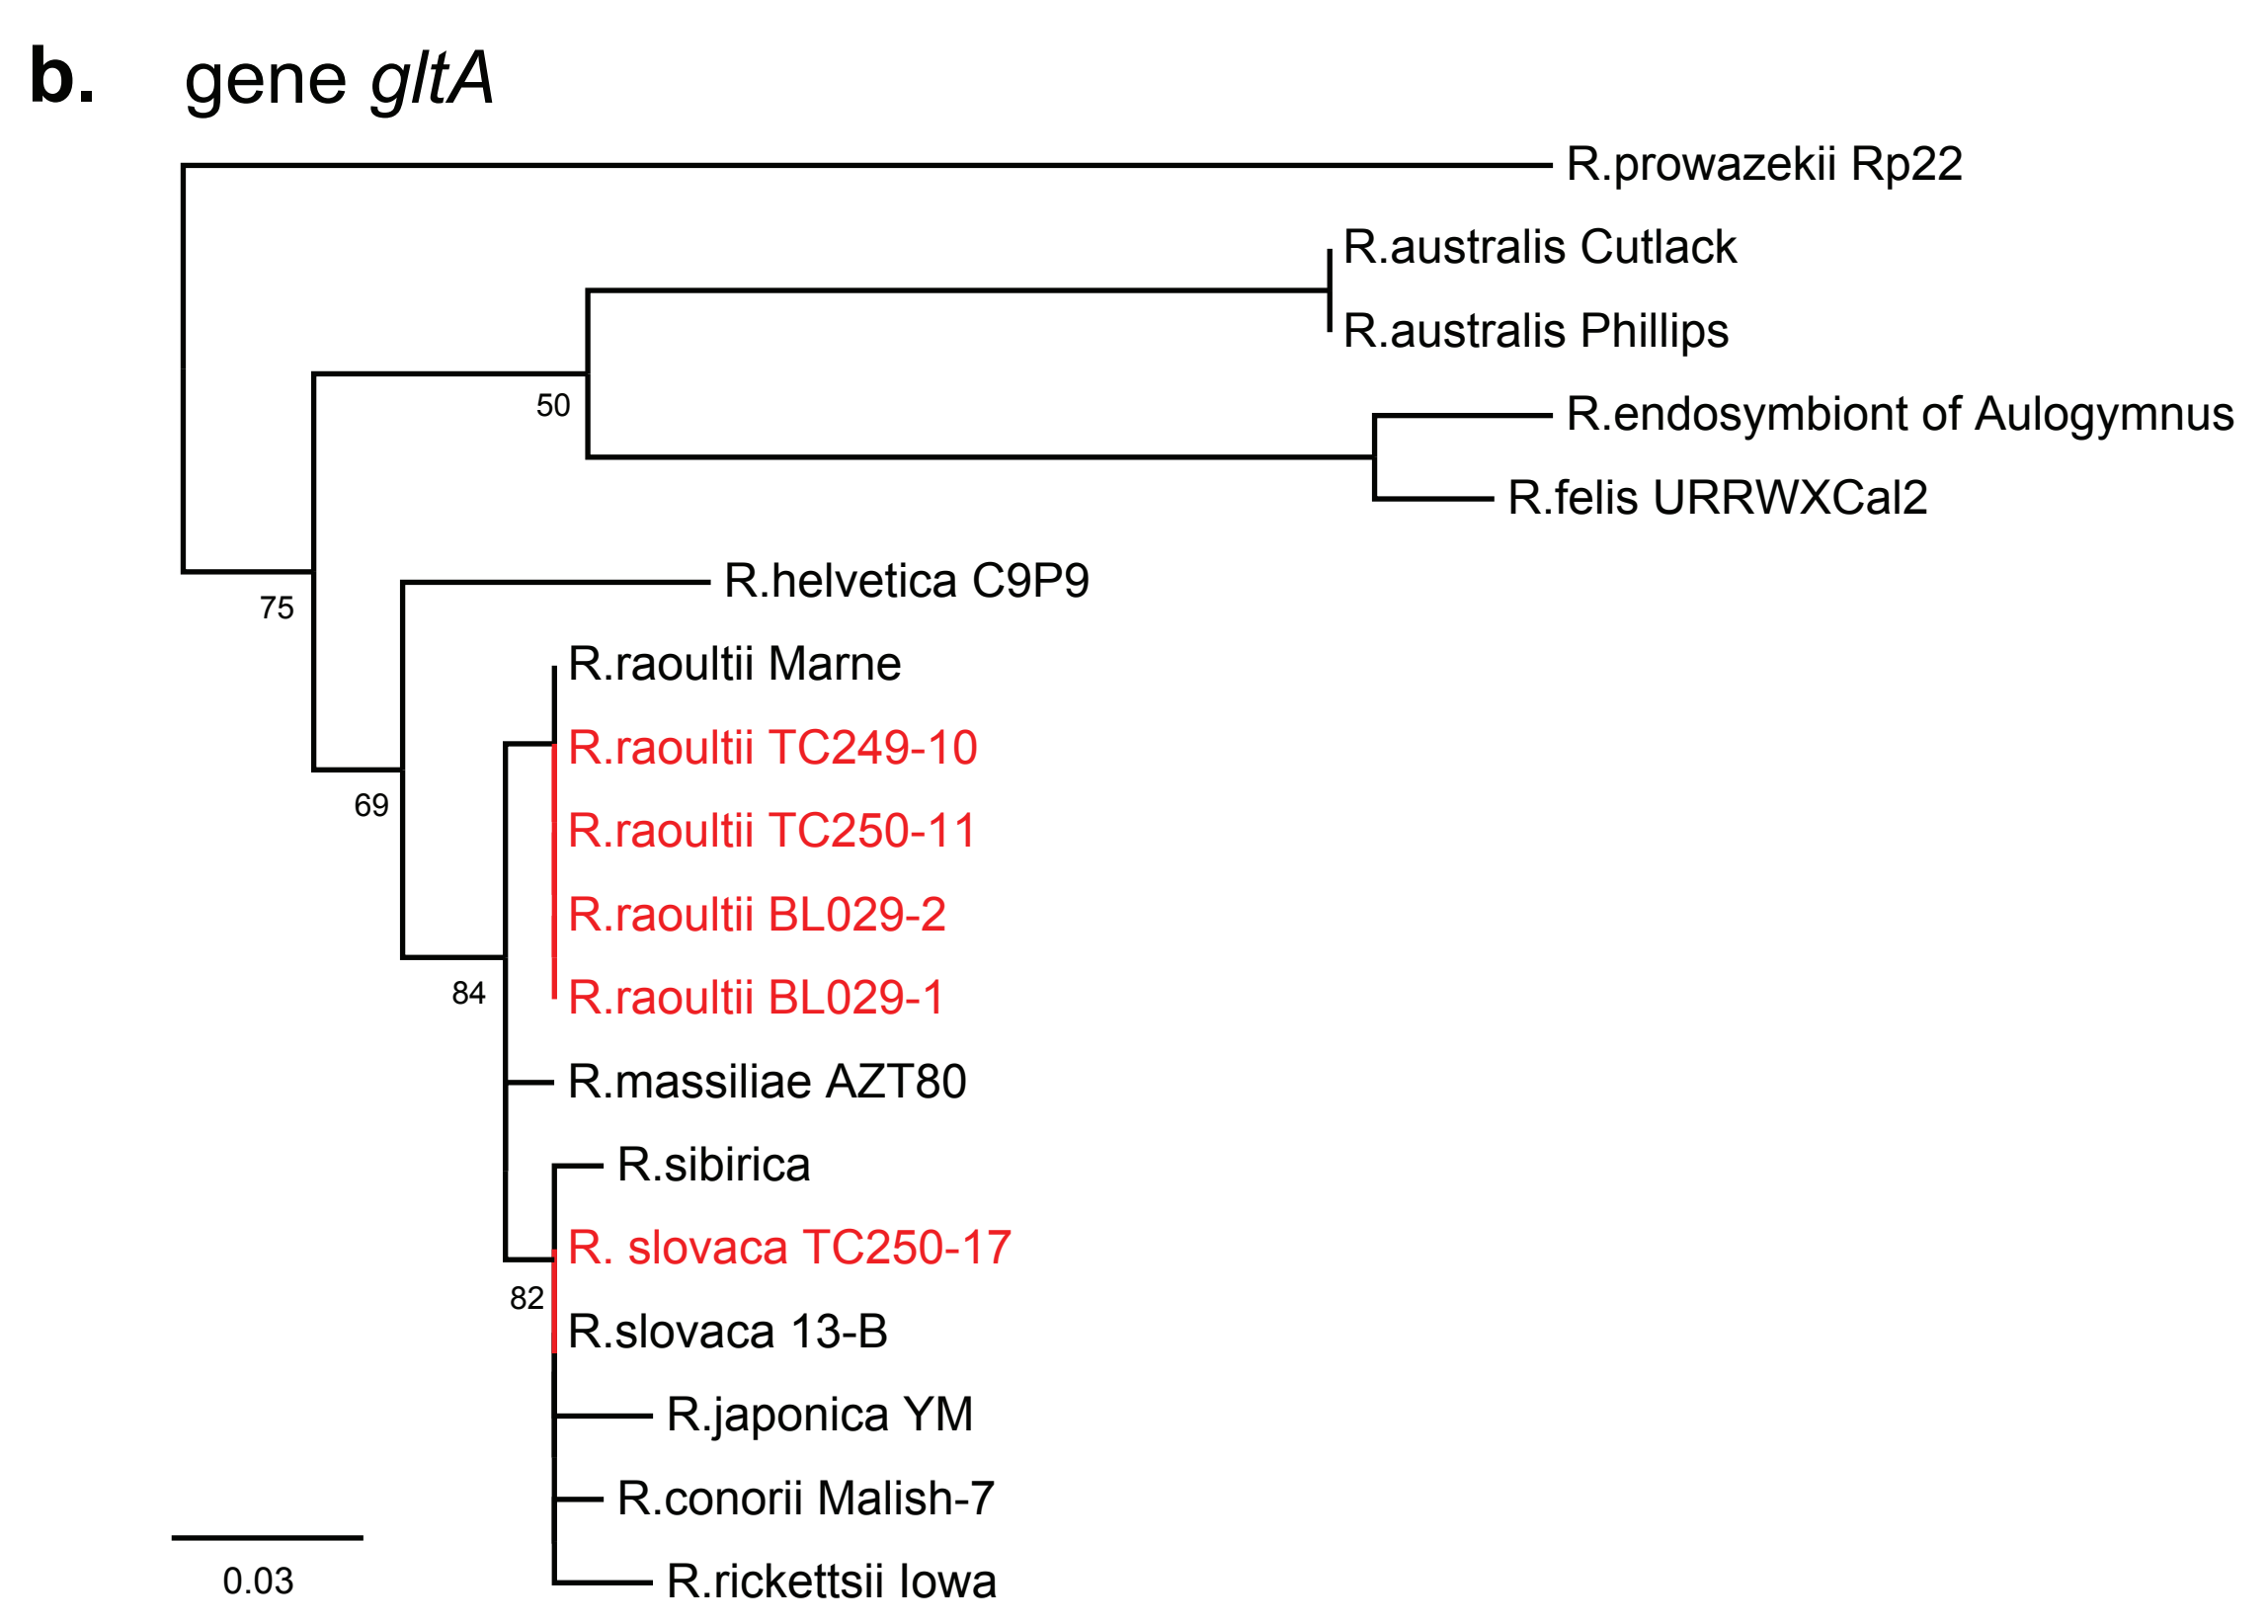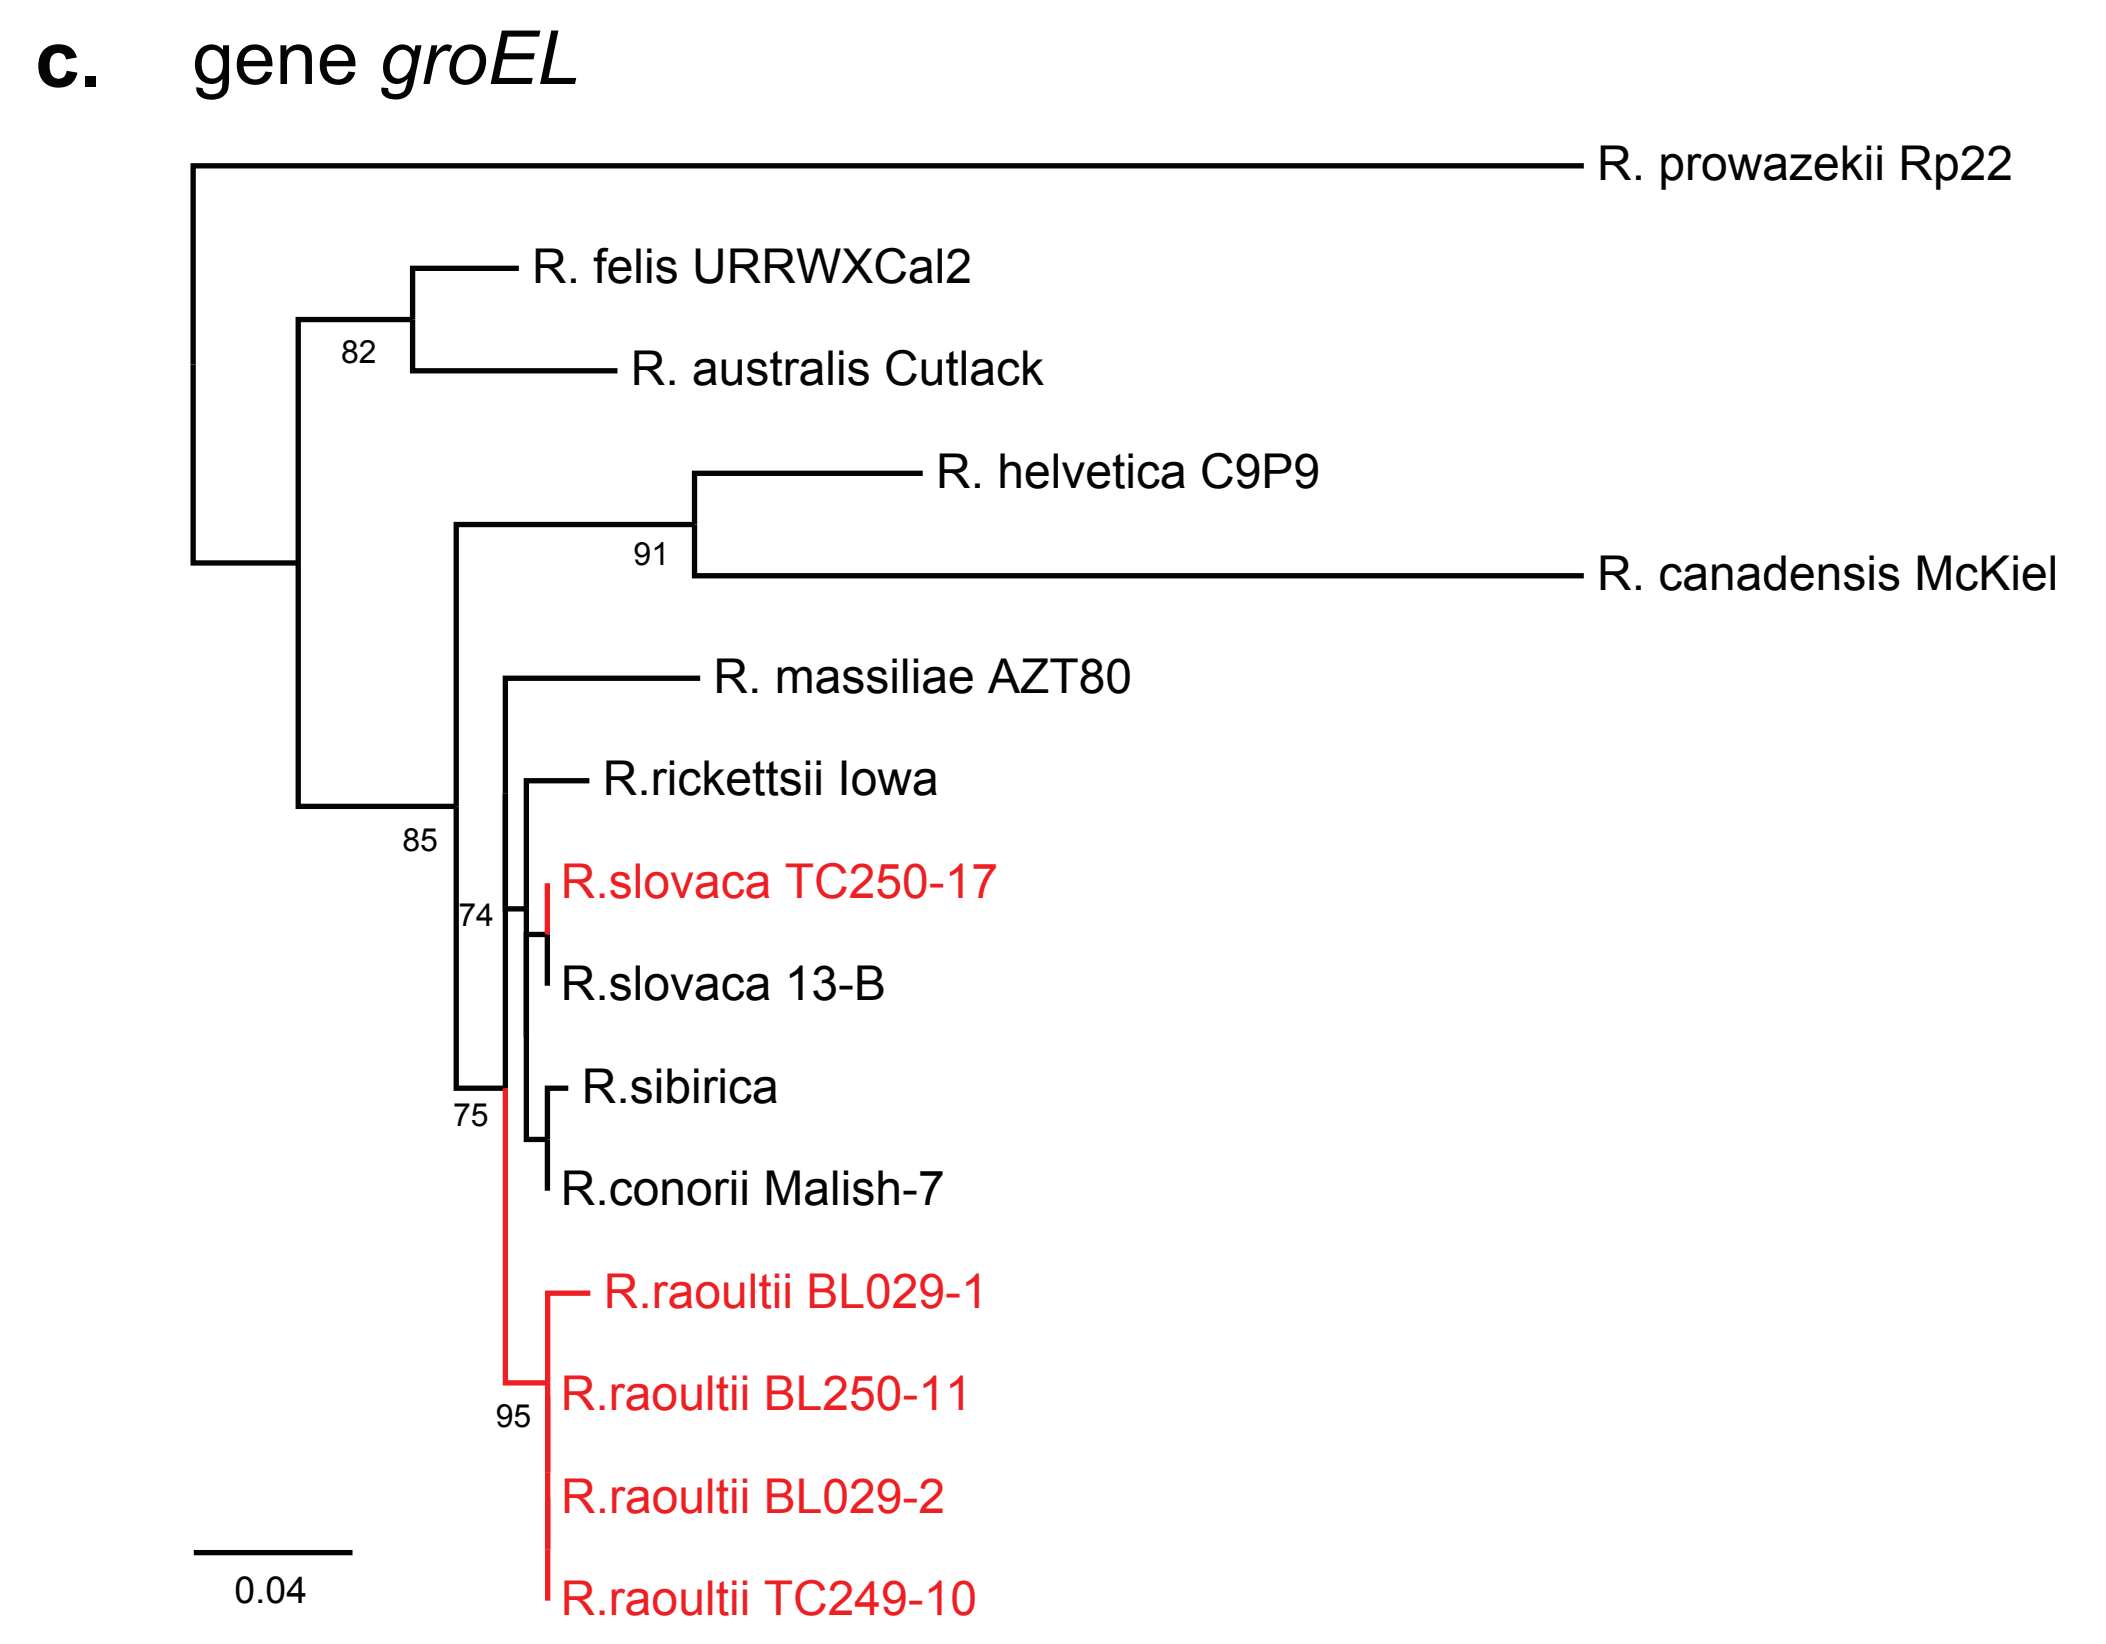

genus *Ehrlichia*

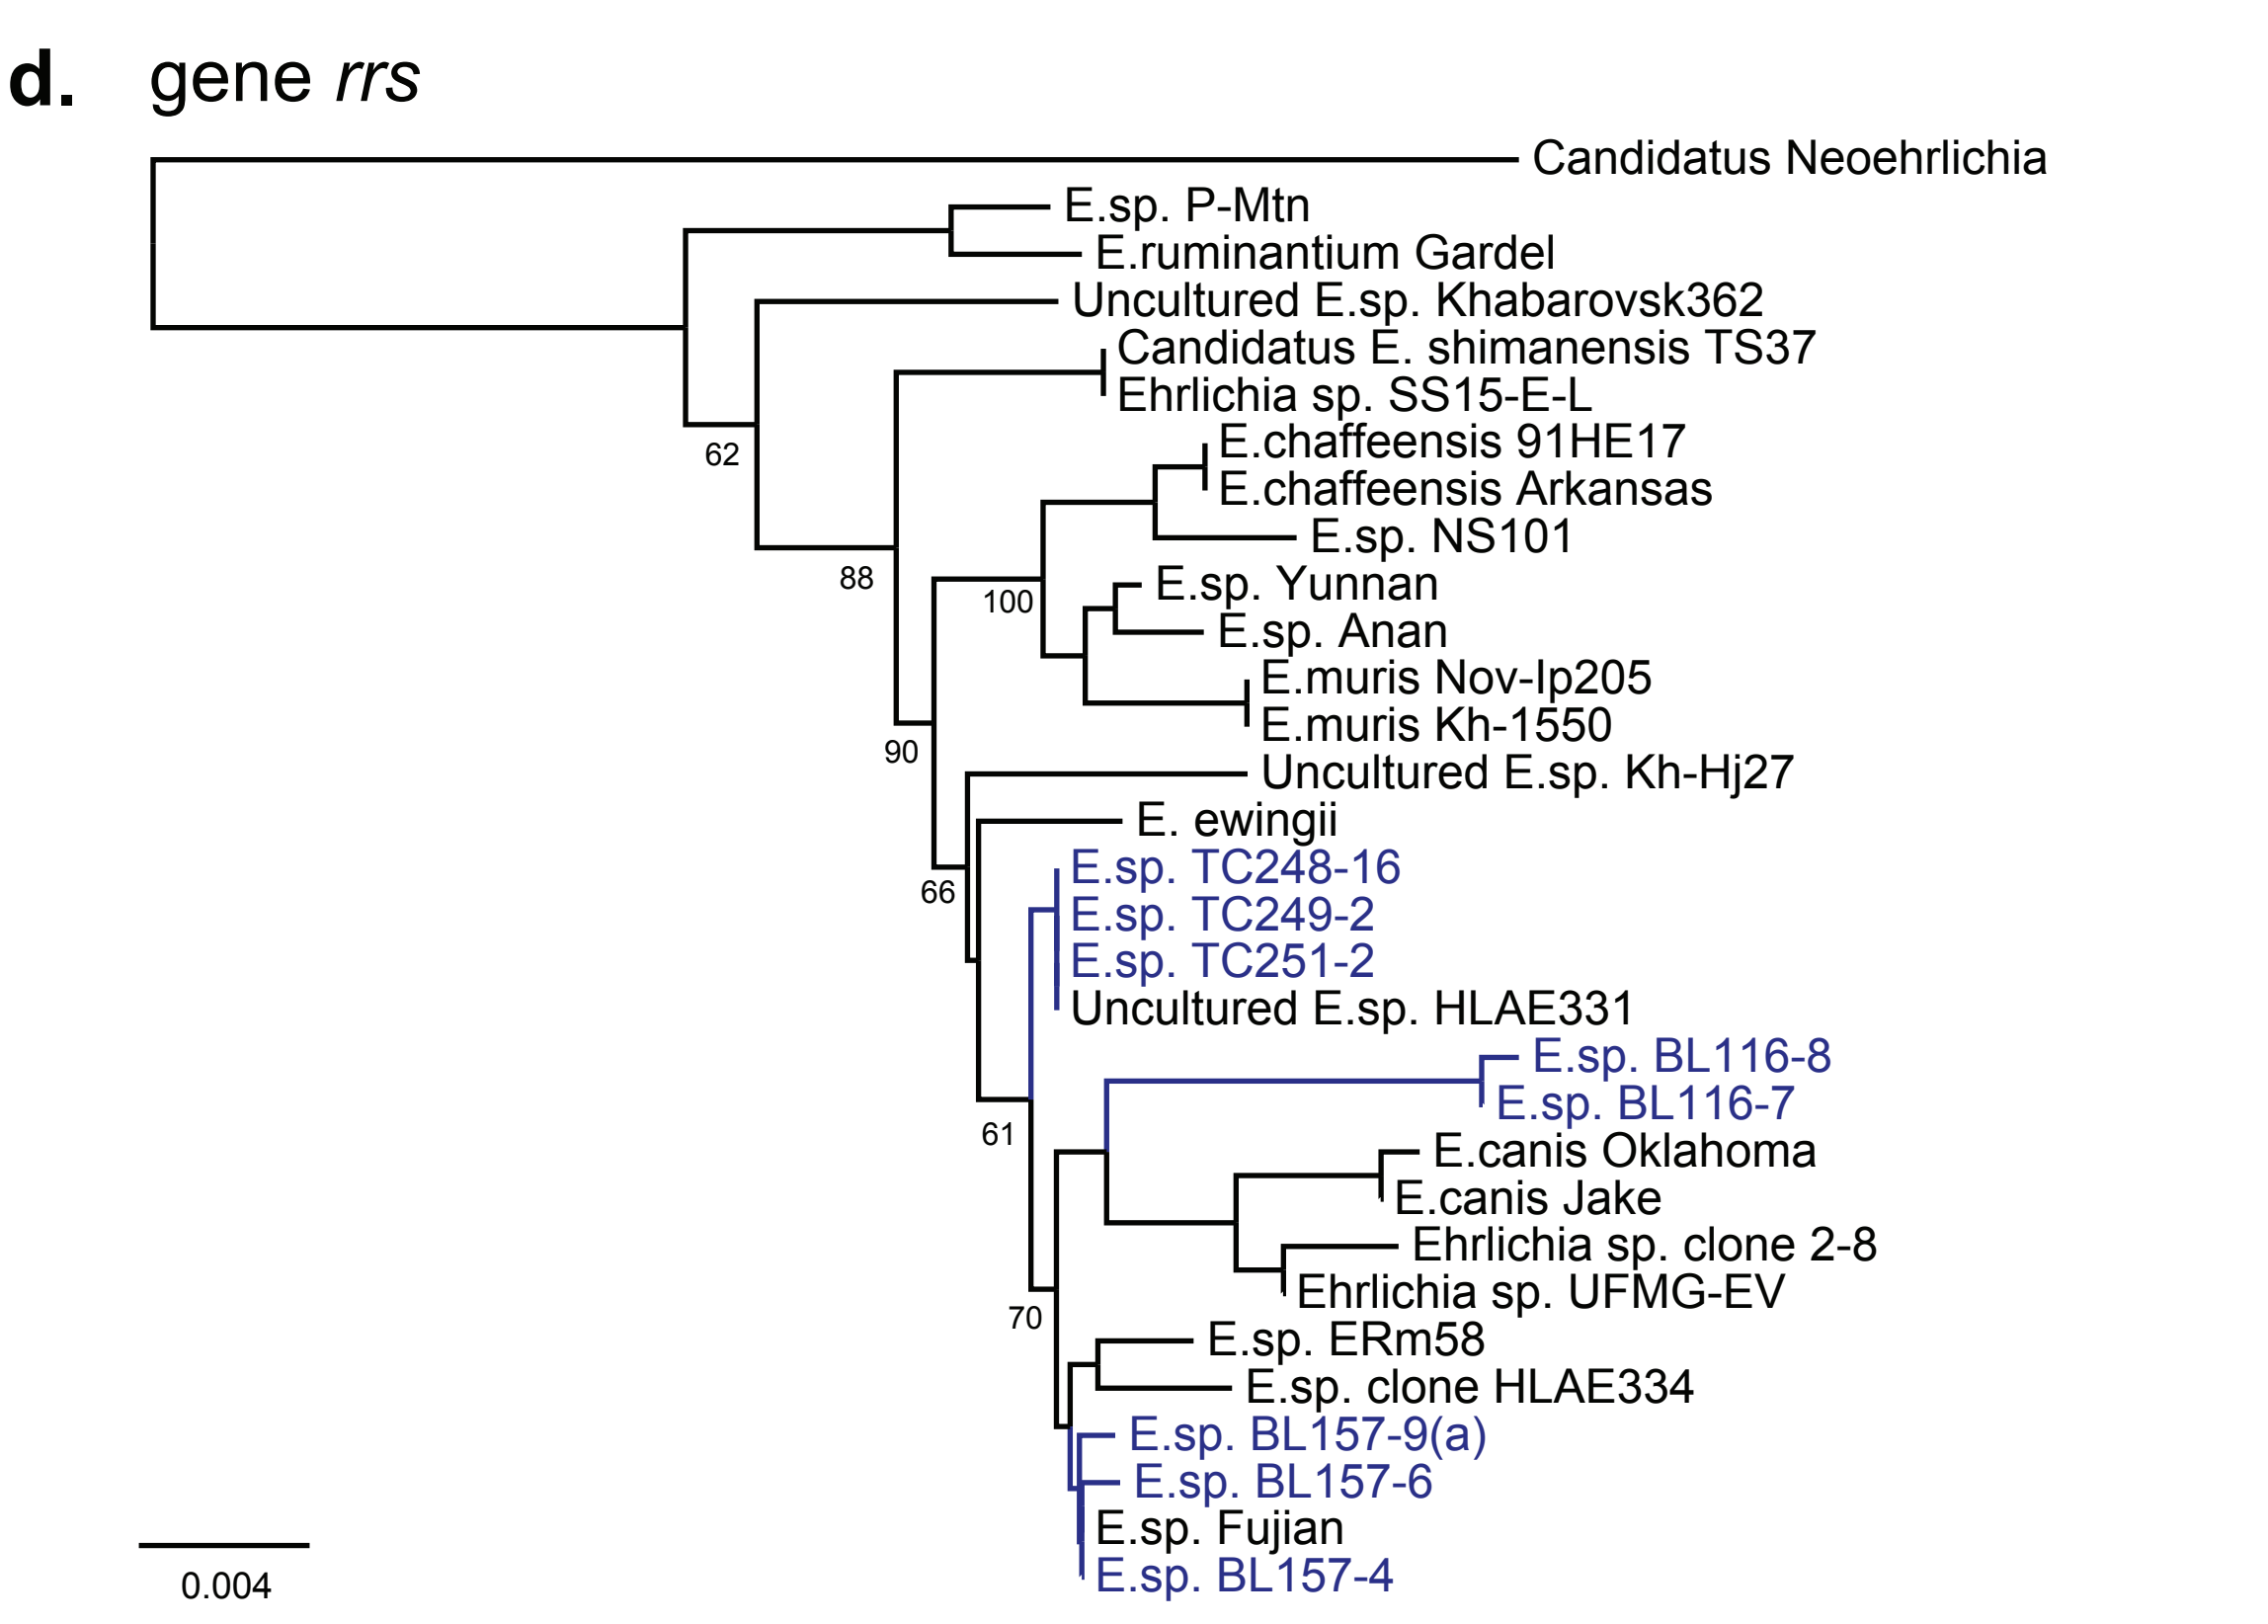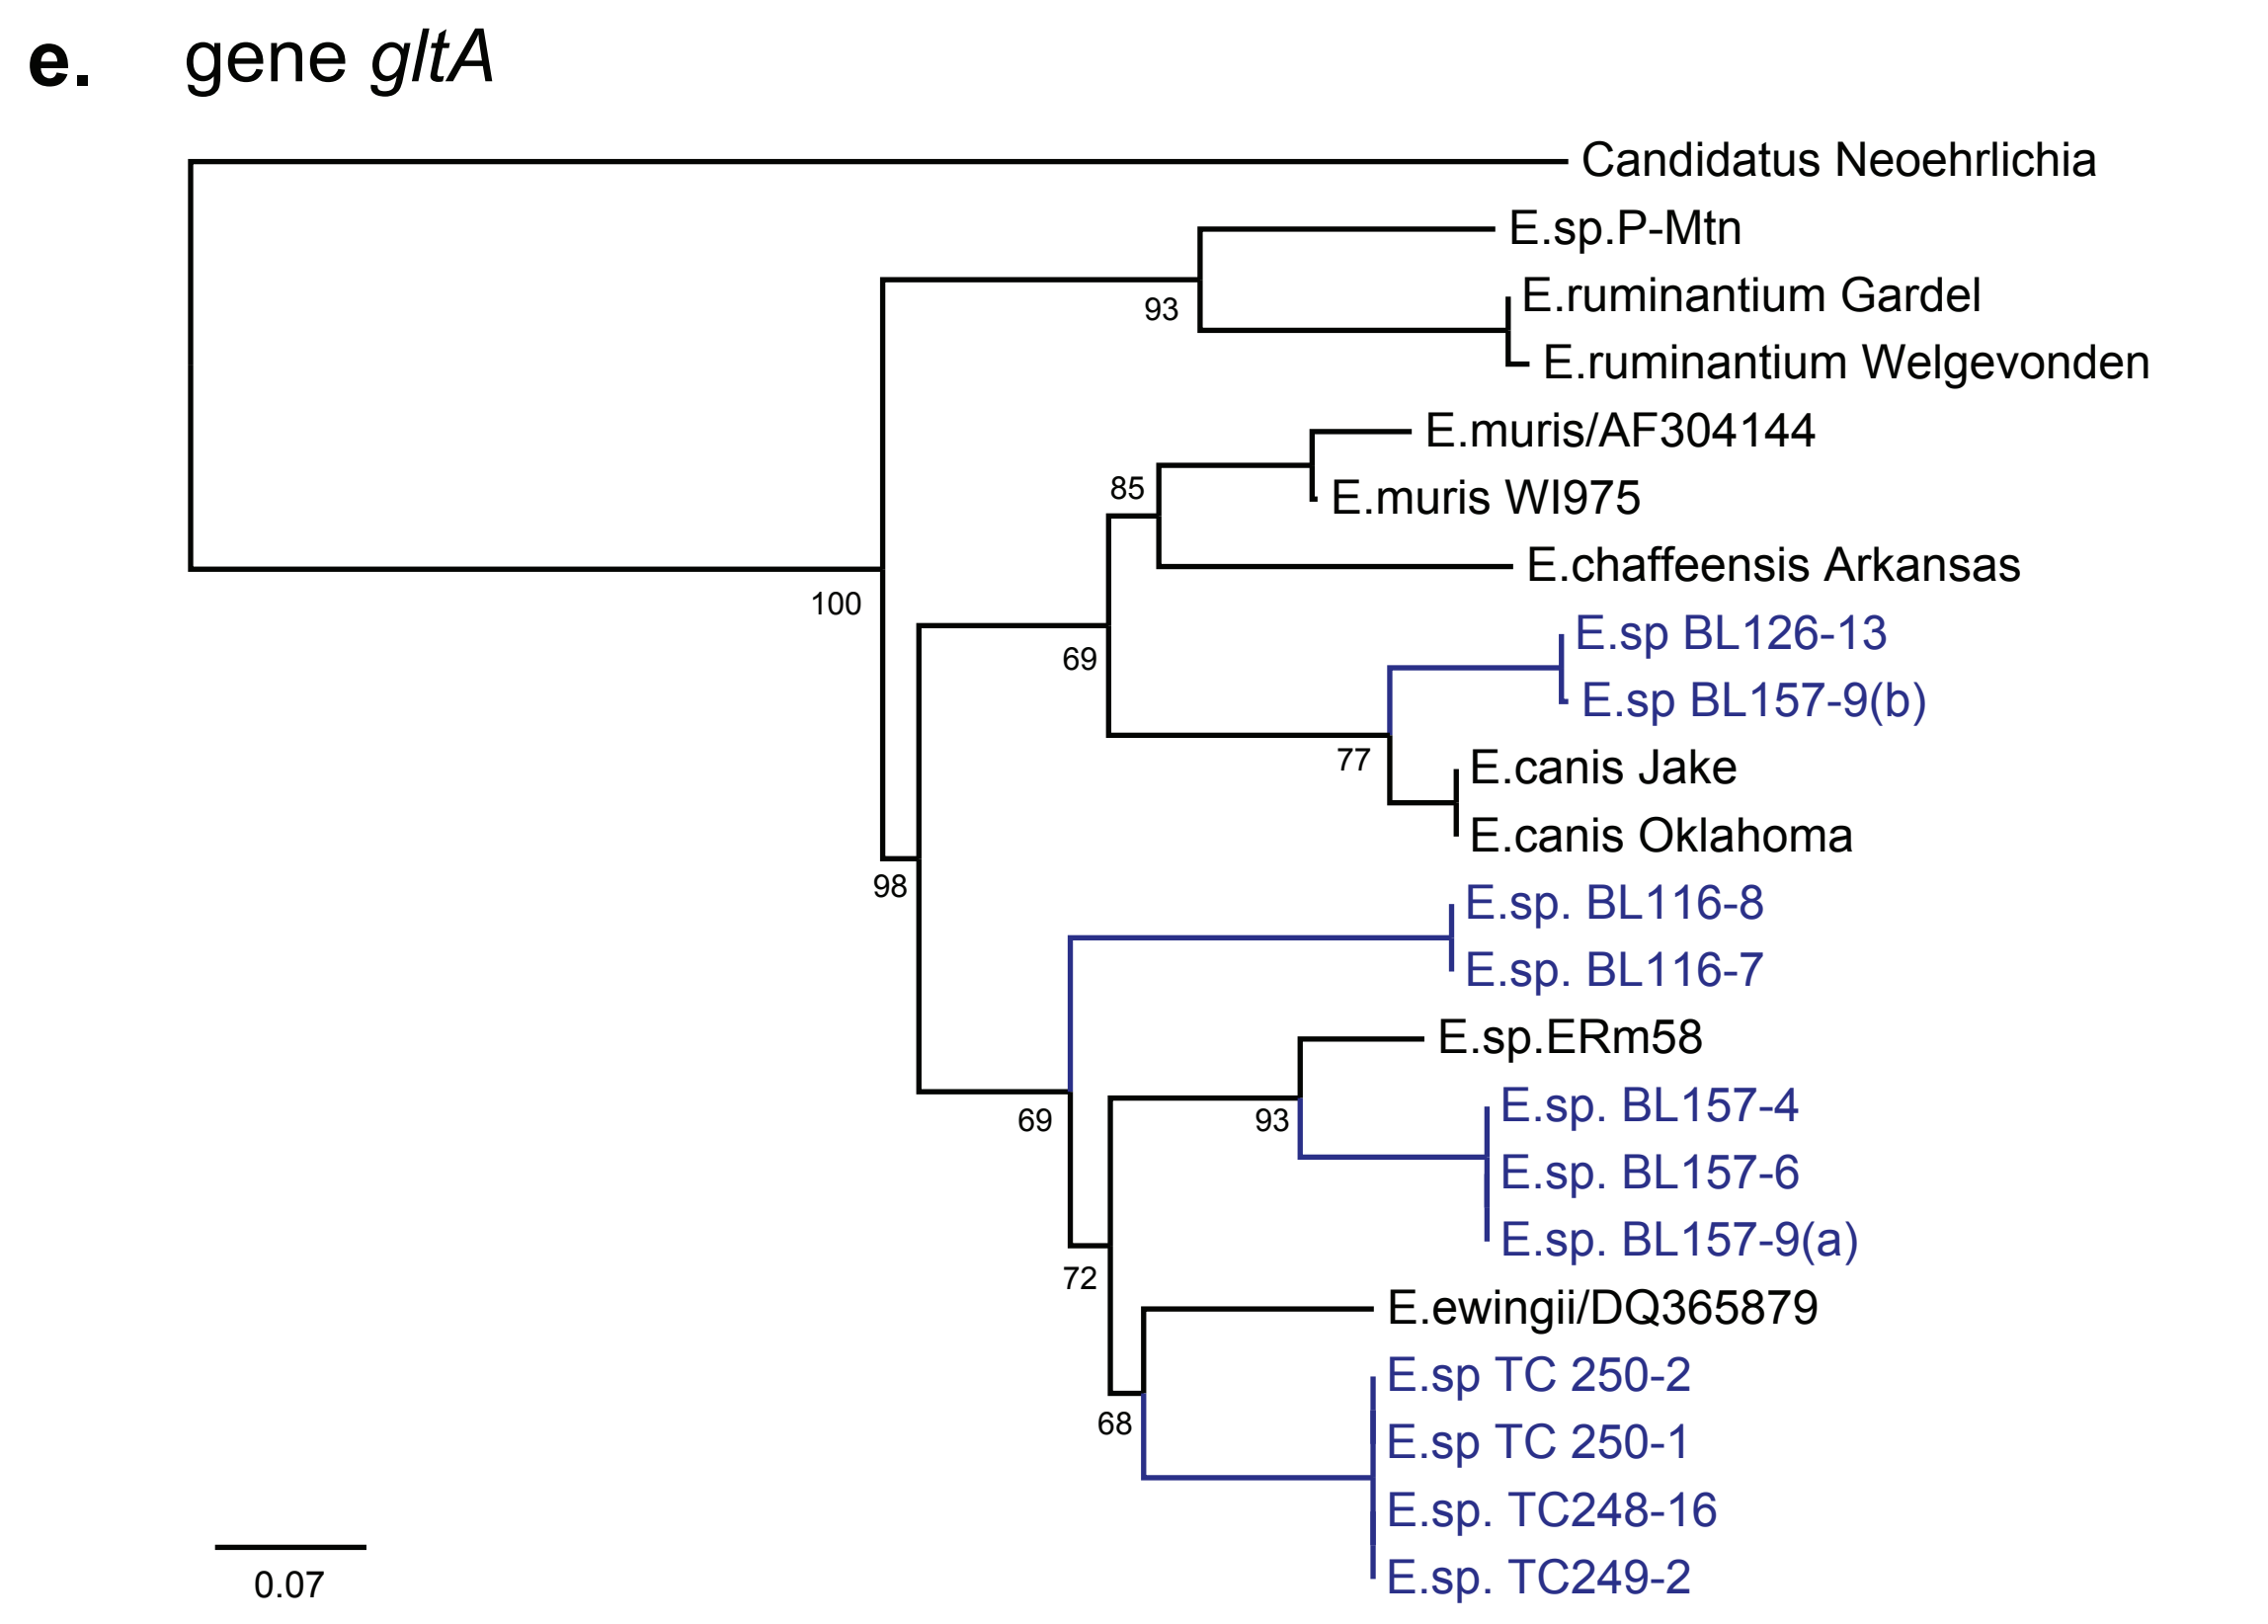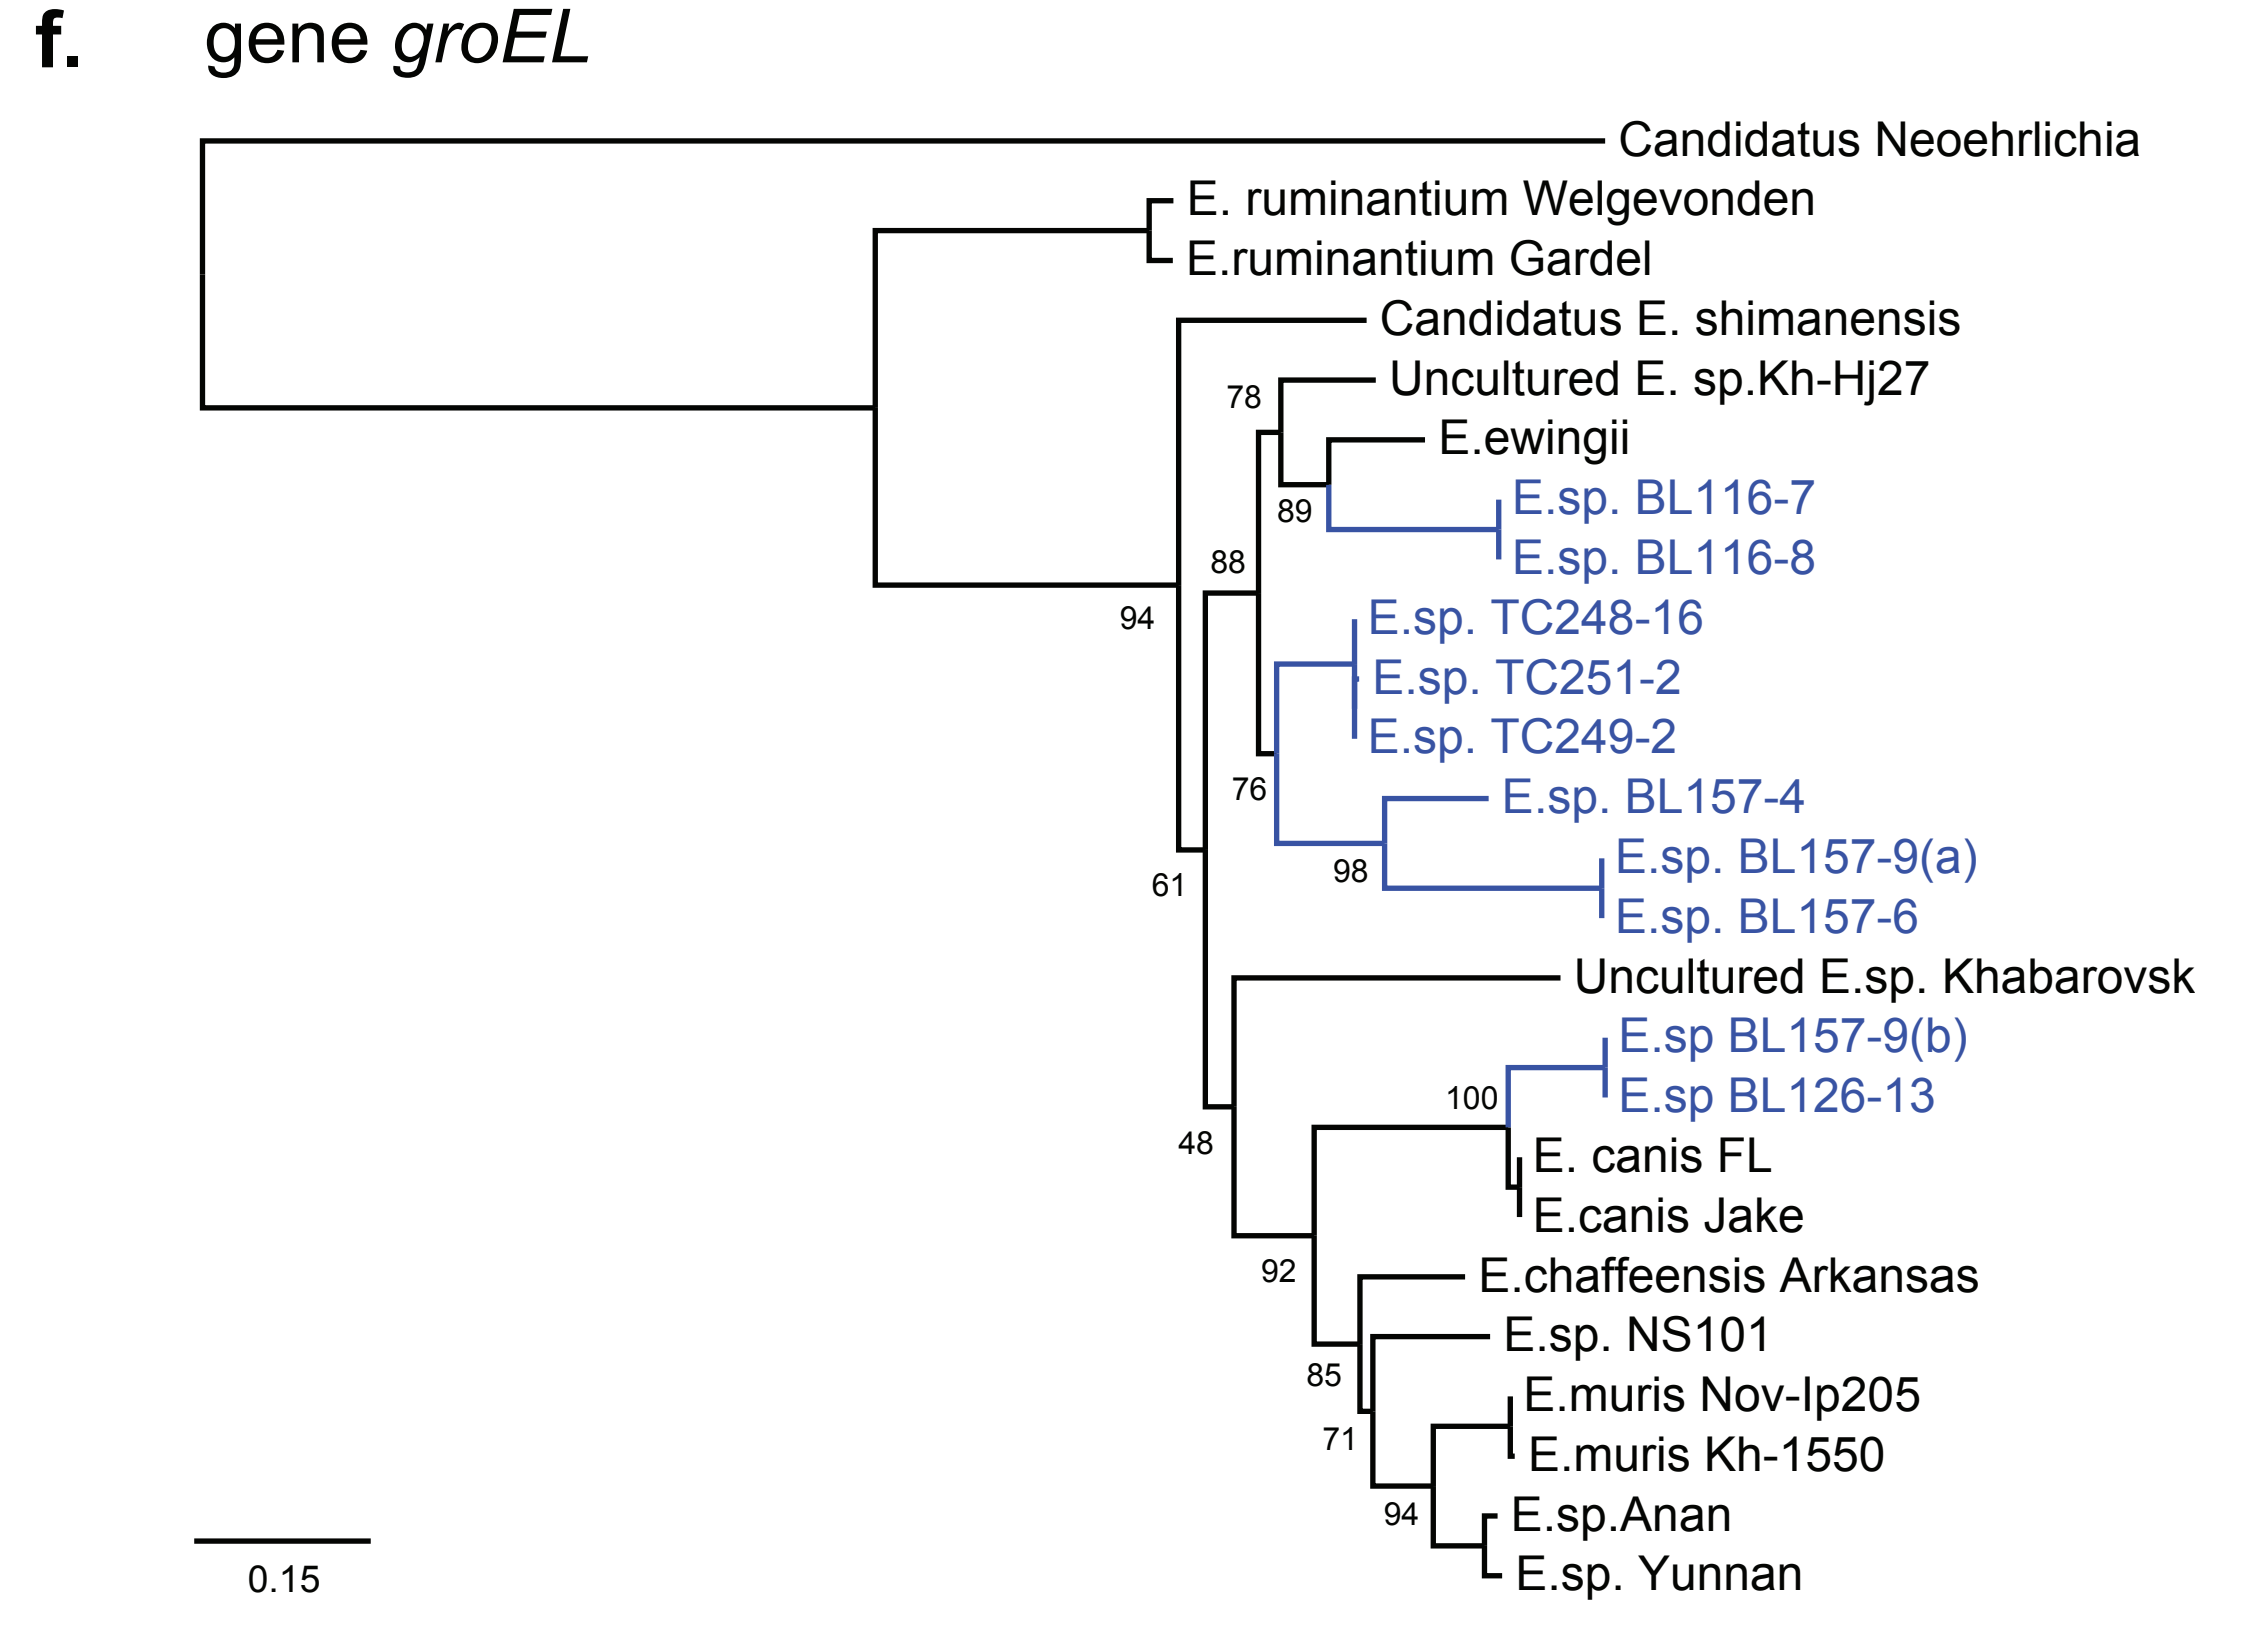

genus *Anaplasma*

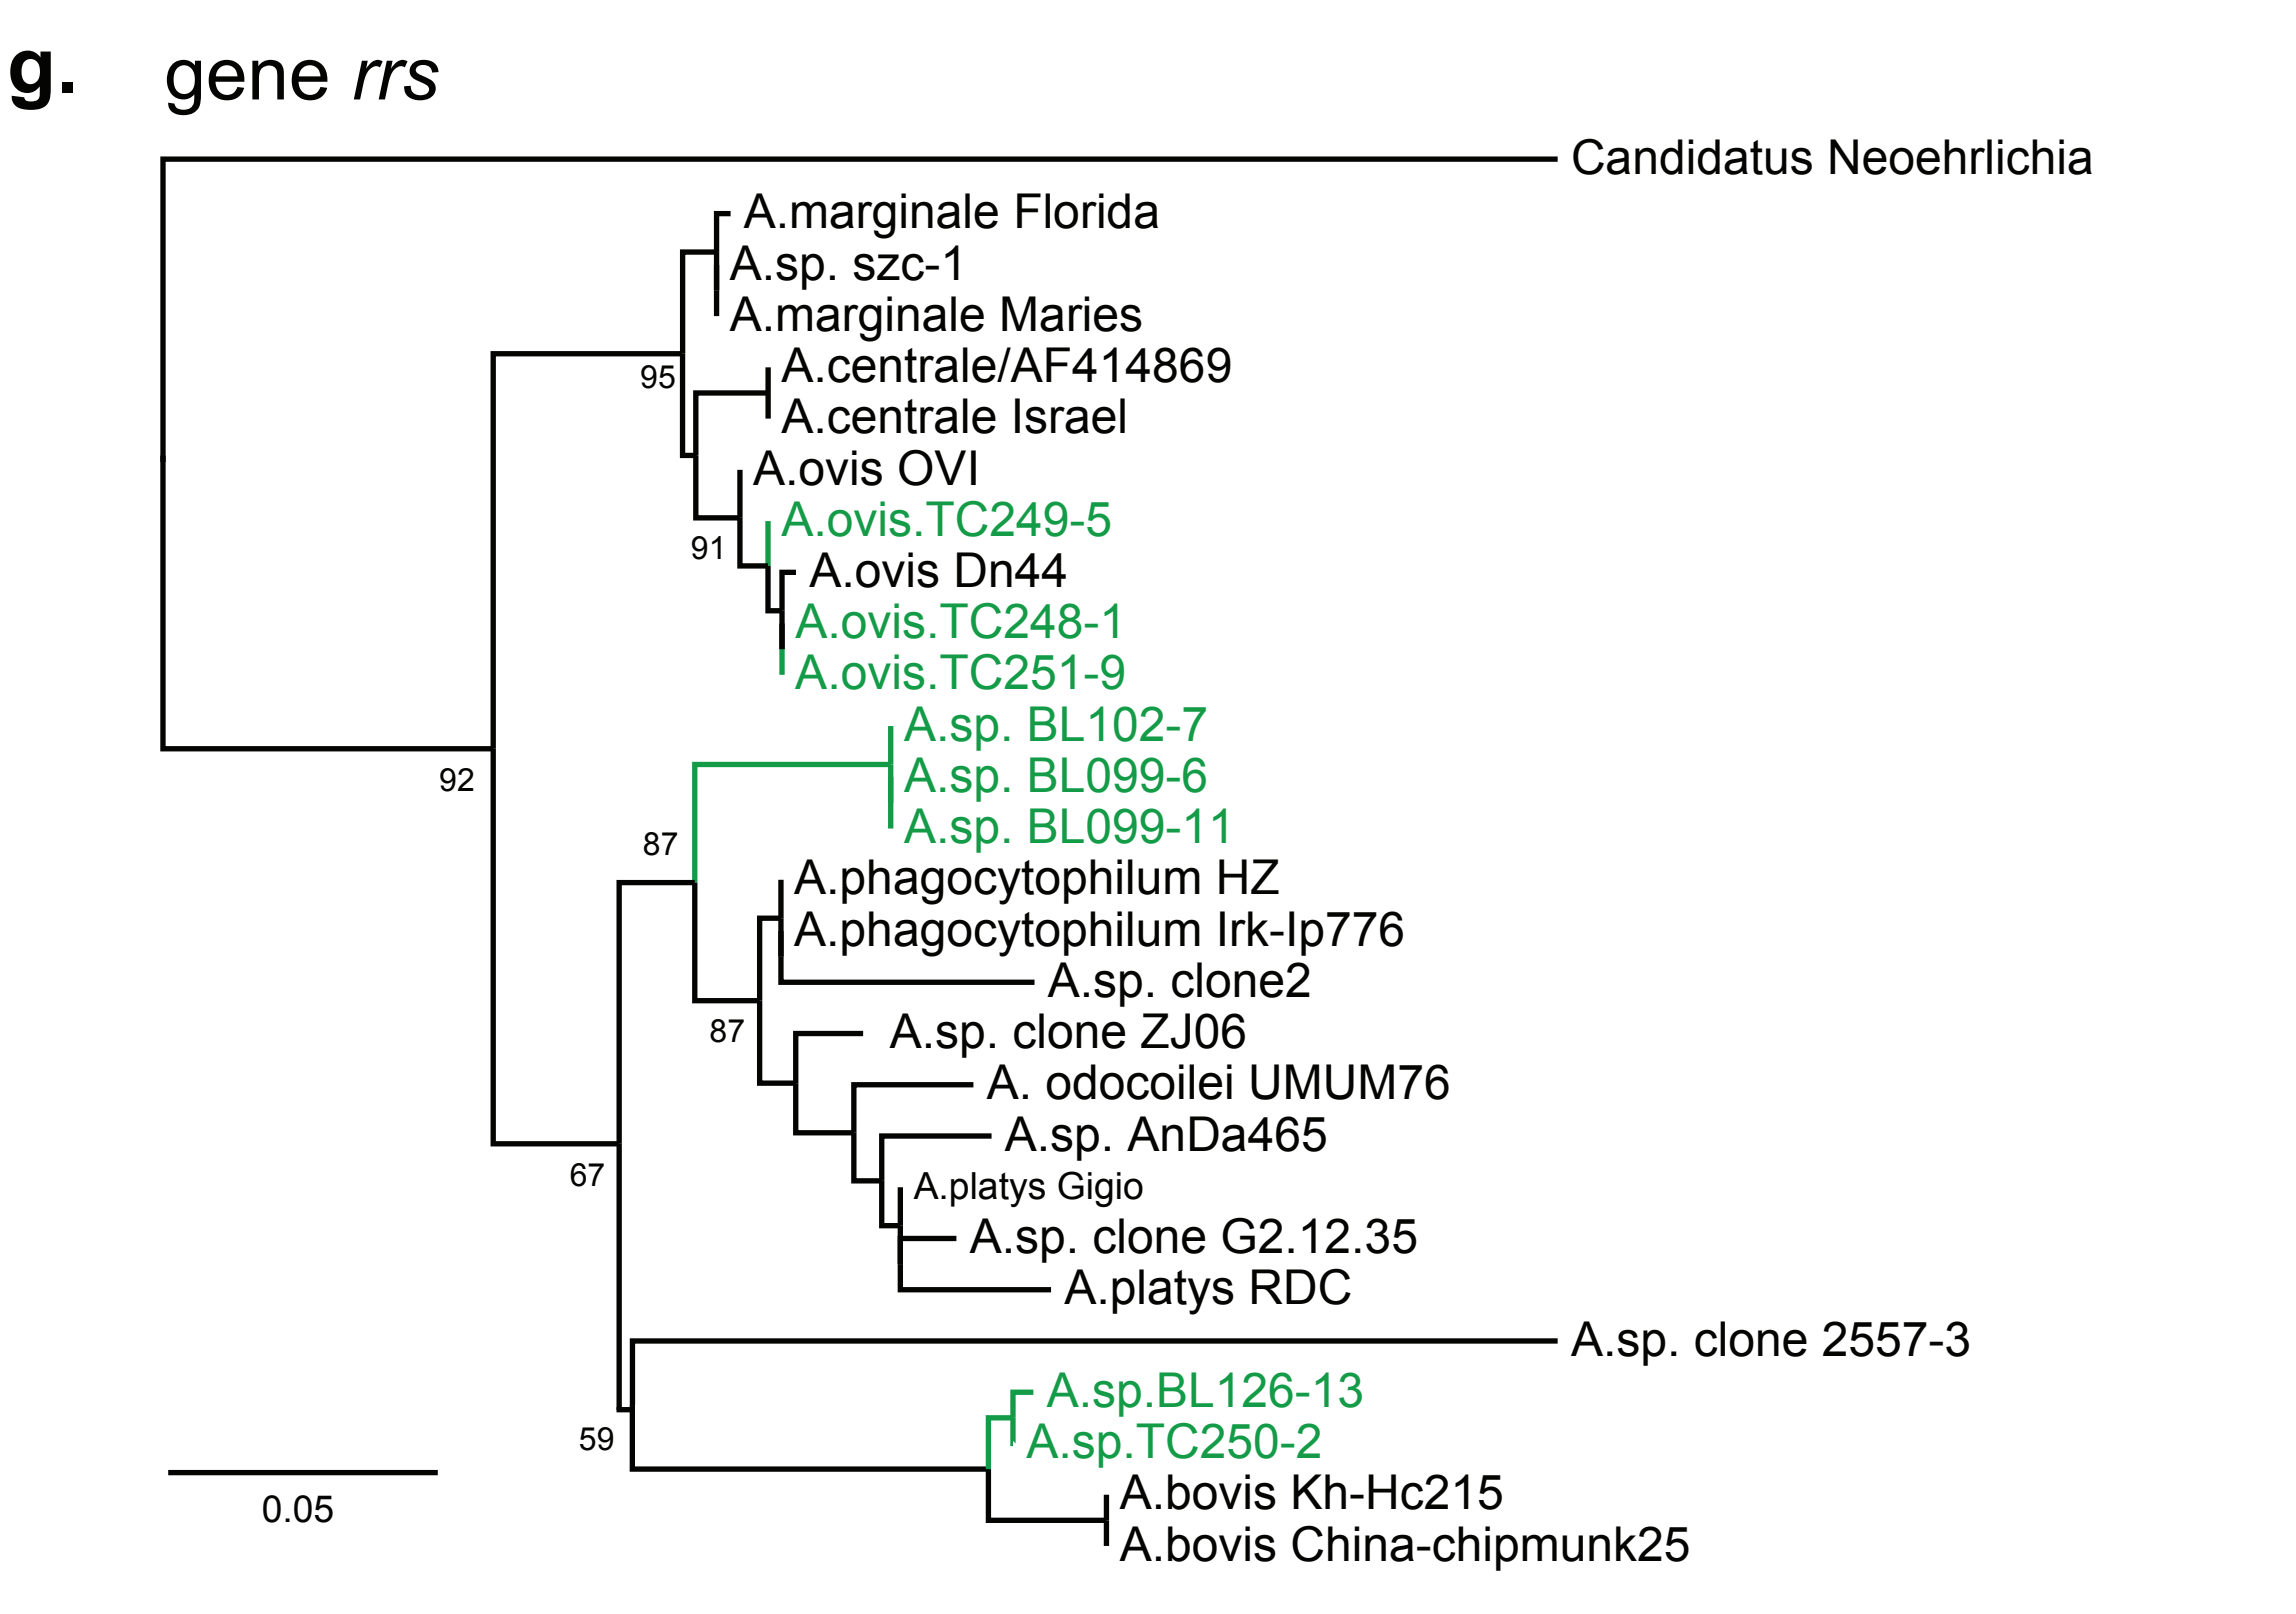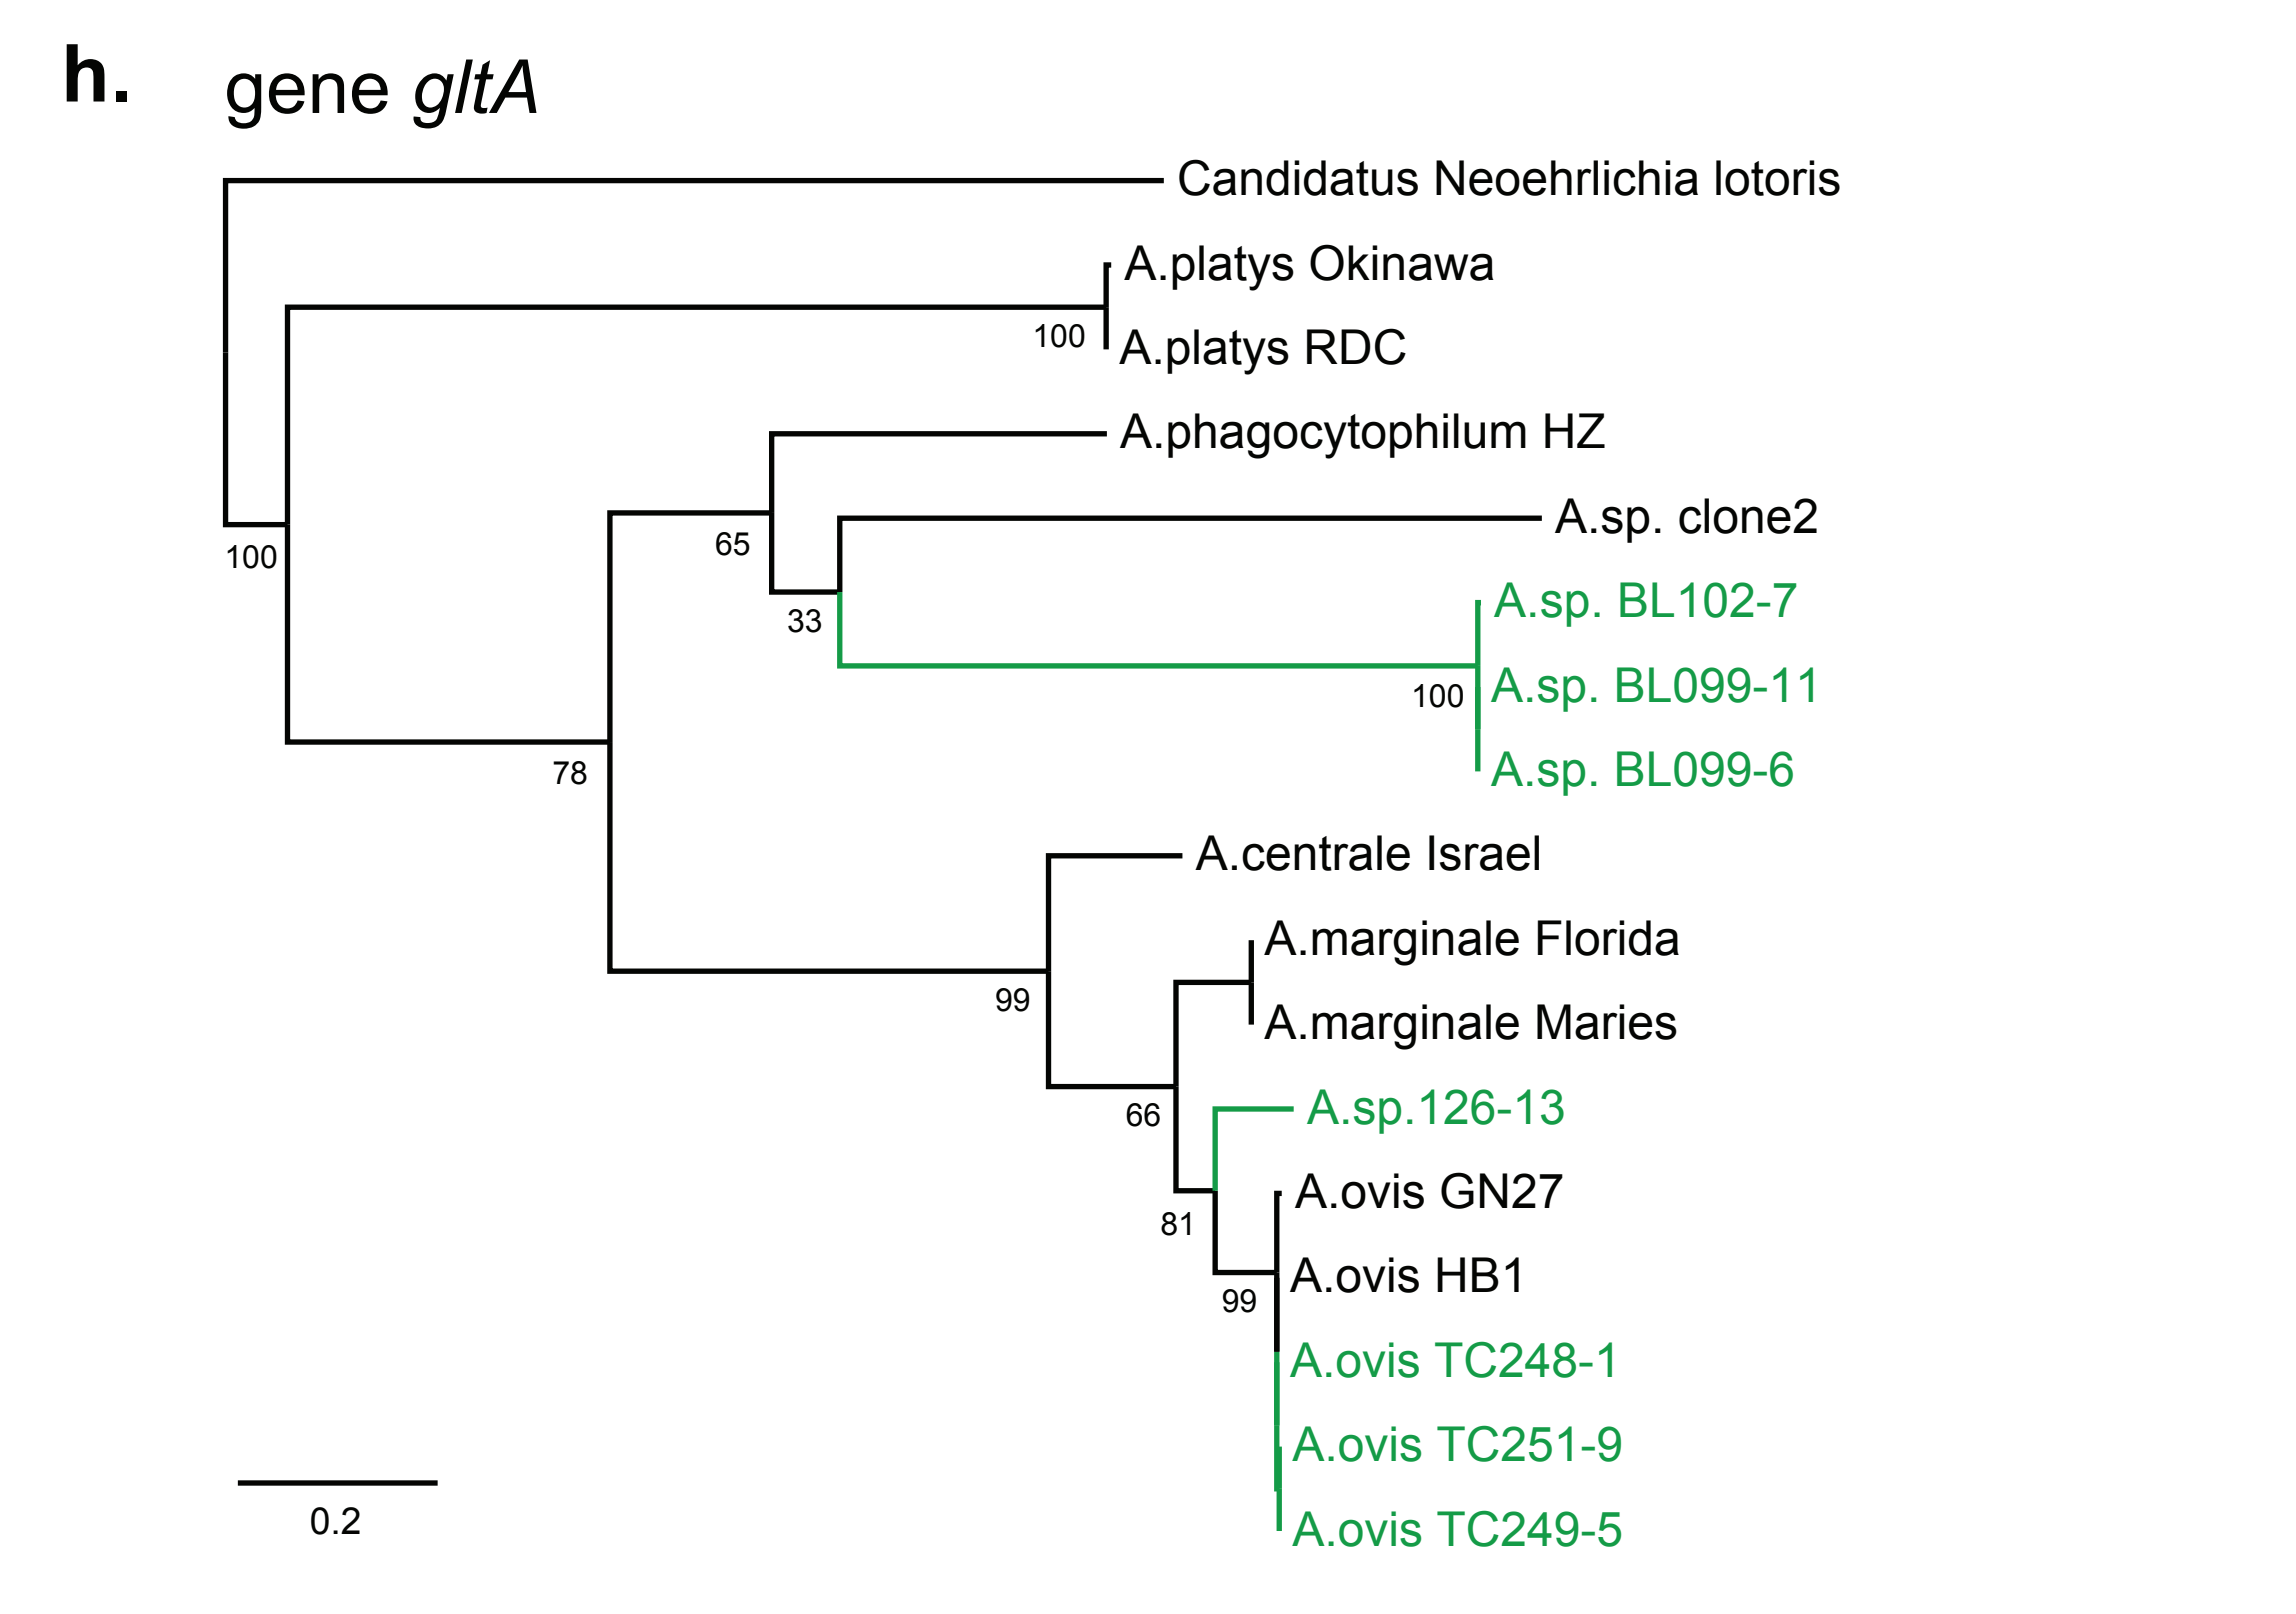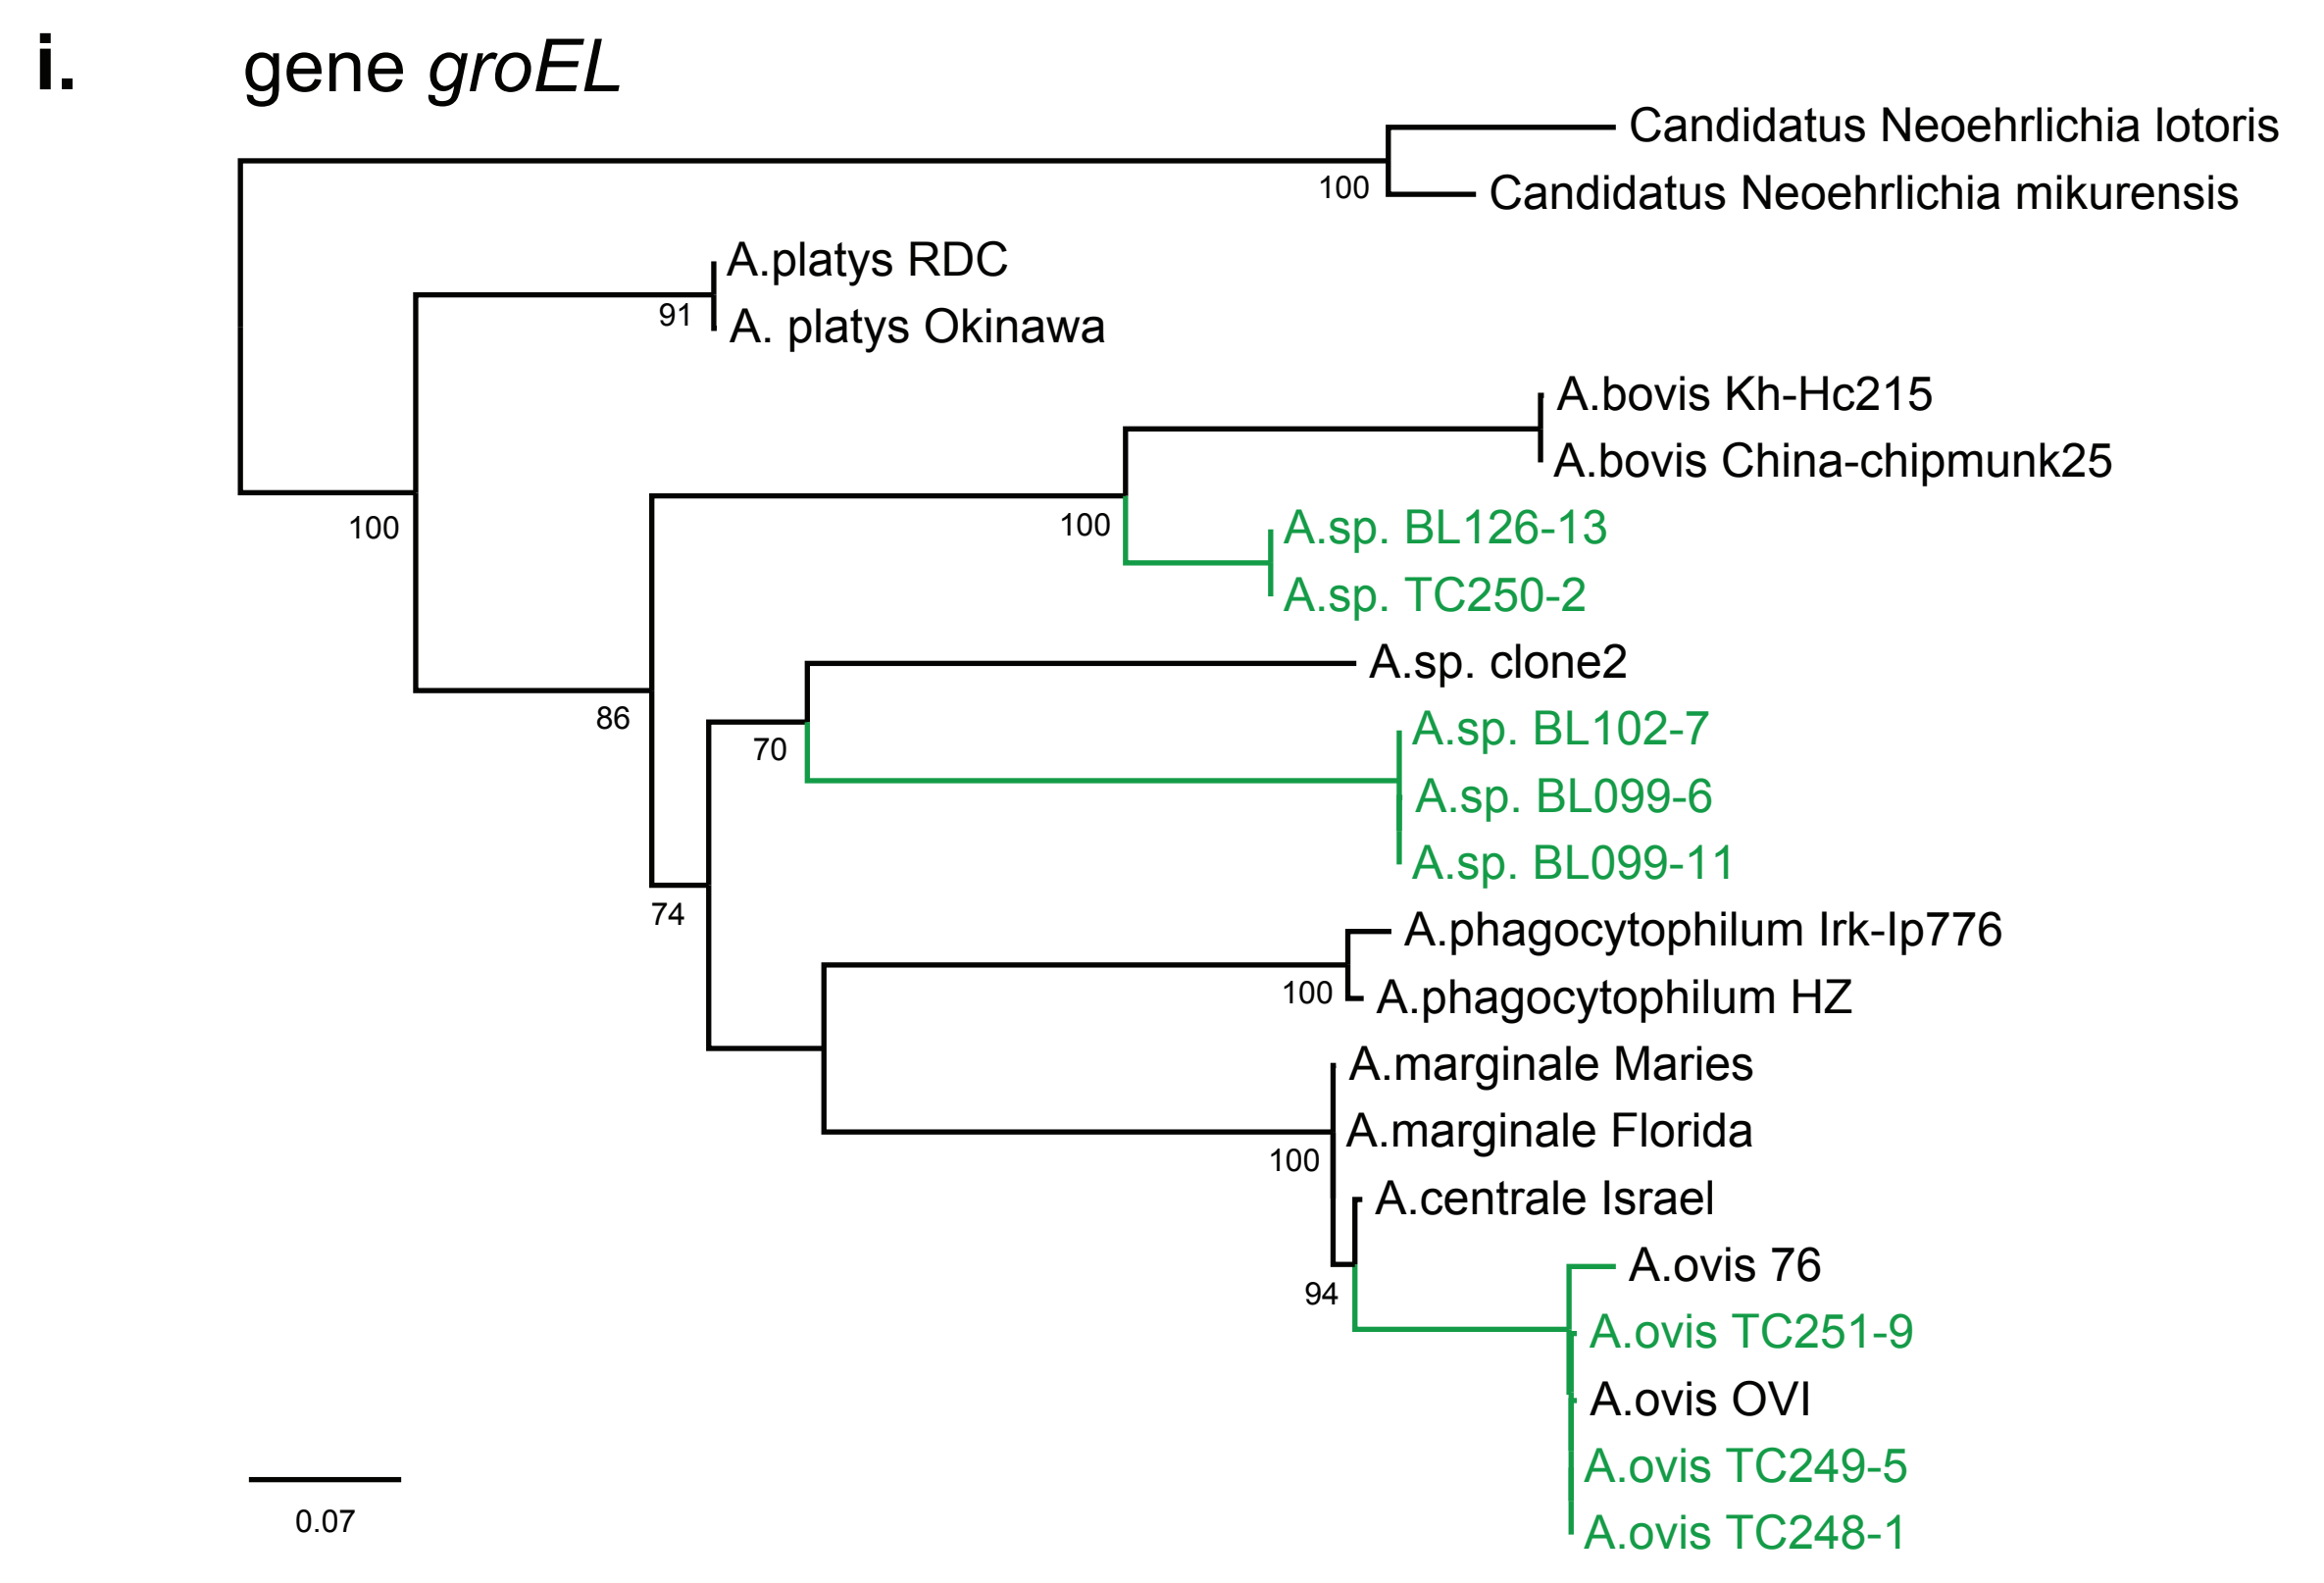

Supplement: s12862-014-0167-2-S3.pdf [file s12862-014-0167-2-S3.pdf]
